# Supplementary material for: Source apportionment of PM 2.5 in Shanghai based on hourly molecular organic markers and other source tracers
Source: Copernicus journal article supplement (doi:10.5194/acp-2019-951), 2020-01-31
Supplement: Supplementary file 1 [file acp-2019-951-supplement.pdf]

*Supplement of*

## **Source apportionment of PM<sub>2.5</sub> in Shanghai based on hourly molecular organic markers and other source tracers**

**Rui Li and Qiongqiong Wang, et al.**

*Correspondence to:* Li Li (Lily@shu.edu.cn) and JianZhen Yu (jian.yu@ust.hk)

**Figure S1. Comparison of reconstructed and measured PM<sub>2.5</sub> mass for samples collected at Shanghai in 2018.**

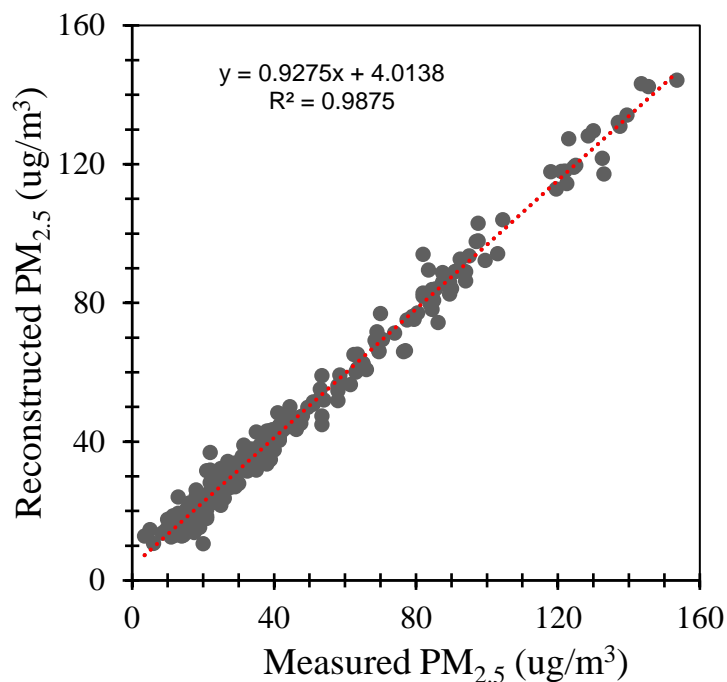

**Figure S2. Change of Q/Q<sub>exp</sub> value from 7 to 14 factors run for MM-PMF.**

When the number of factors increases to a certain value, Q/Q<sub>exp</sub> will change less dramatically. Q/Q<sub>exp</sub> changed by 6.4% from the 10- to 11-factor model, less significant than the 11.4- 13.1% observed when the number of factors varied from 6 to 10, suggesting the factor number reaching ten was needed for explaining the input data. However, when examining factor profiles, the 11- factor solution provides the most reasonable source profiles by separating the vehicle exhaust from secondary nitrate factors. The 11-factor result of the vehicle emission source is a more accurate analysis of the composition of the atmospheric pollution source in Shanghai, China.

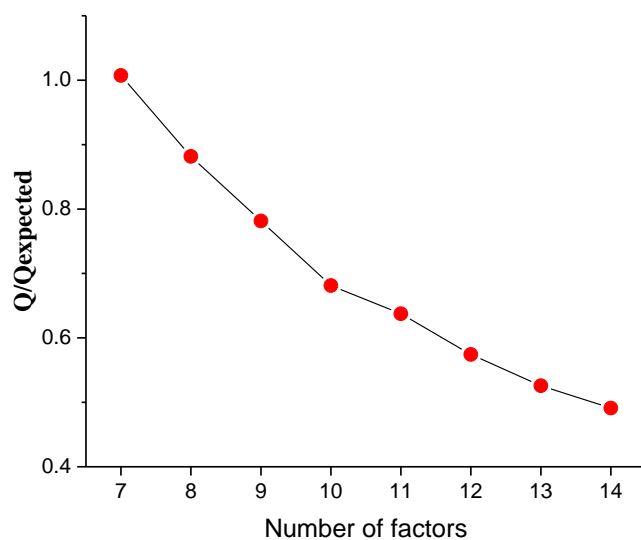

**Figure S3. Change of  $Q/Q_{exp}$  value from 5 to 11 factors run for PMFt.**

When the number of factors increases to a certain value,  $Q/Q_{exp}$  will change less dramatically.  $Q/Q_{exp}$  changed by 10.3% from the 8- to 9-factor model, less significant than the 14.2- 25.0% observed when the number of factors varied from 5 to 8, suggesting the factor number reaching eight or nine was needed for explaining the input data. Increasing to 9 factors, Fe and Pb are no longer in the Industrial Emission or Coal combustion factor and forms an unexplainable factor. Finally choose the 8-factor result

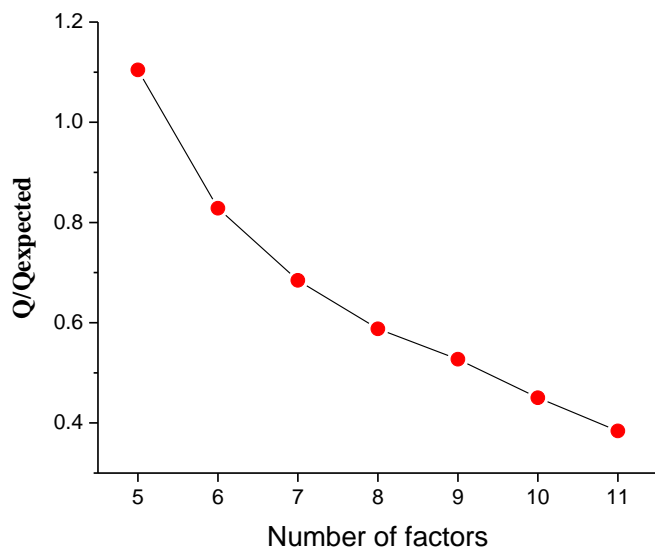

**Figure S4. Air mass trajectories during observation.**

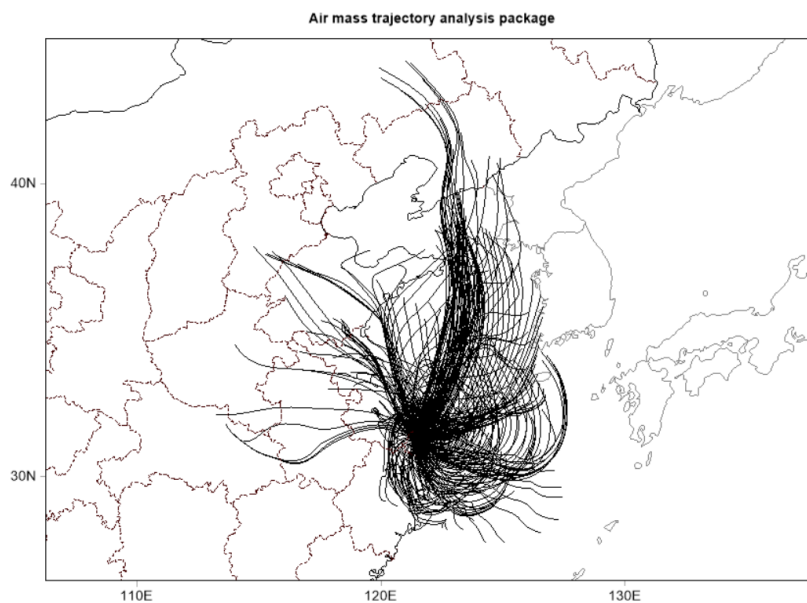

**Figure S5. The average concentration of PM<sub>2.5</sub> and the percentage of components represented by each episode.**

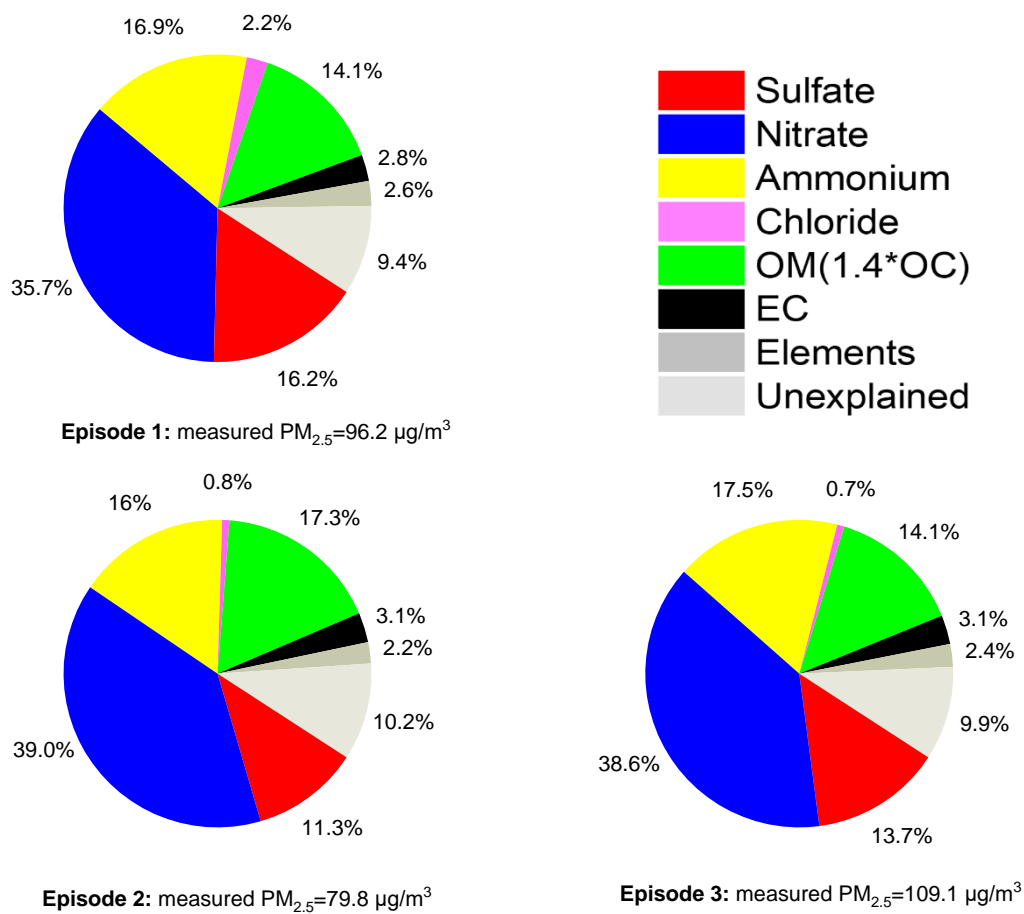

**Figure S6. Resolved factor profiles (left) and factor contributions (right) in eight-factor solution in PMFt.**

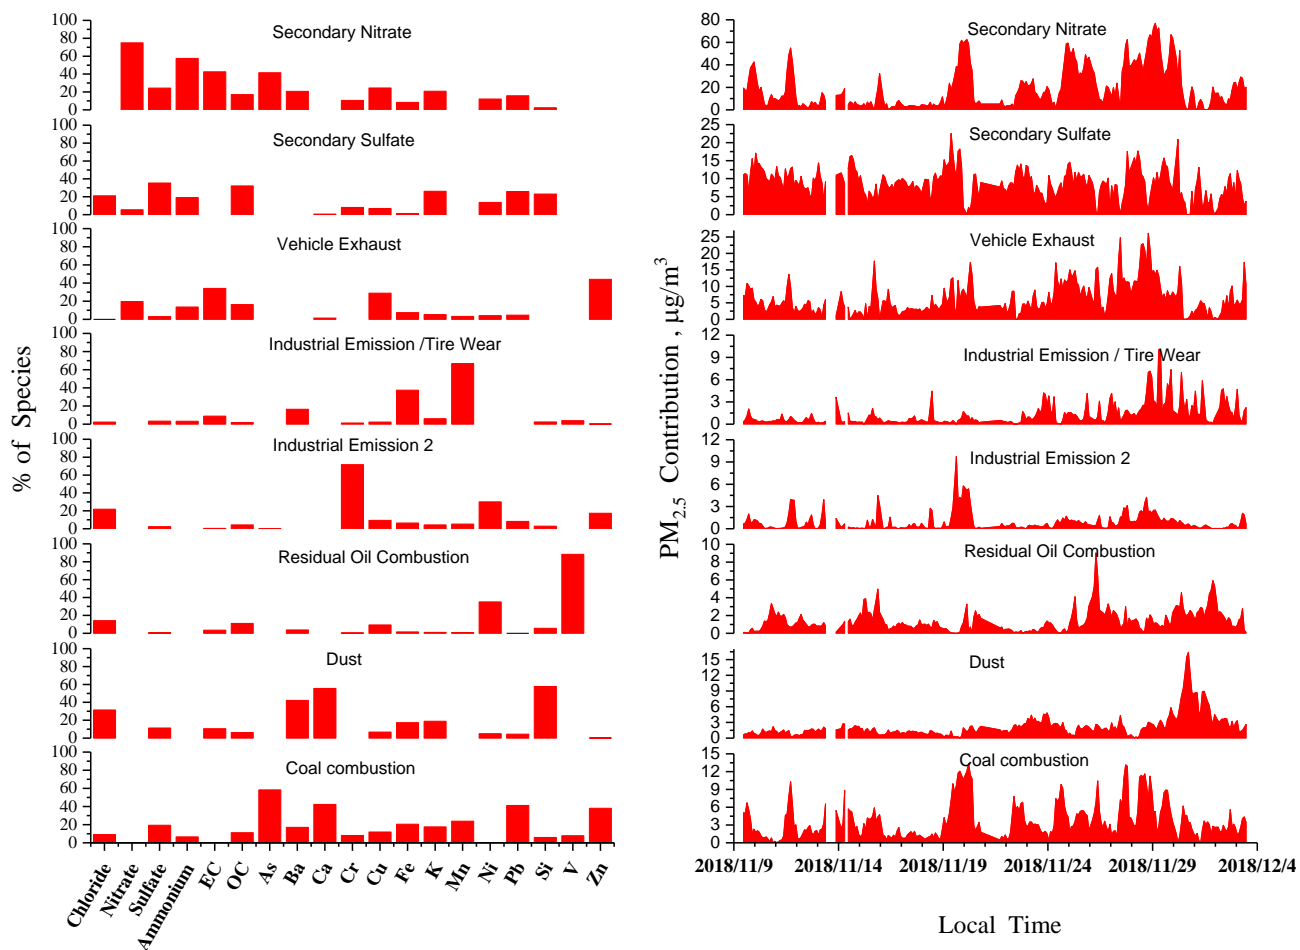

**Table S1. Summary of error estimation diagnostics from BS, DISP and BS-DISP for MM-PMF.**

| <b>BS Mapping(<math>R \geq 0.6</math>)</b> | Secondary Nitrate                 | Secondary Sulfate | Vehicle Exhaust            | Industrial / Tire Wear | Industrial Emission 2 | Residual Oil Combustion              | Dust | Coal combustion        | Biomass Burning | Cooking | SOA | Unmapped |
|--------------------------------------------|-----------------------------------|-------------------|----------------------------|------------------------|-----------------------|--------------------------------------|------|------------------------|-----------------|---------|-----|----------|
| Secondary Nitrate                          | 97                                | 1                 | 0                          | 0                      | 0                     | 0                                    | 0    | 1                      | 1               | 0       | 0   | 0        |
| Secondary Sulfate                          | 5                                 | 90                | 0                          | 1                      | 0                     | 0                                    | 0    | 1                      | 1               | 0       | 1   | 1        |
| Vehicle Exhaust                            | 20                                | 1                 | 61                         | 0                      | 0                     | 0                                    | 1    | 3                      | 5               | 0       | 2   | 7        |
| Industrial / Tire Wear                     | 0                                 | 0                 | 0                          | 100                    | 0                     | 0                                    | 0    | 0                      | 0               | 0       | 0   | 0        |
| Industrial Emission 2                      | 0                                 | 0                 | 0                          | 0                      | 100                   | 0                                    | 0    | 0                      | 0               | 0       | 0   | 0        |
| Residual Oil Combustion                    | 0                                 | 0                 | 0                          | 0                      | 0                     | 100                                  | 0    | 0                      | 0               | 0       | 0   | 0        |
| Dust                                       | 1                                 | 1                 | 0                          | 1                      | 0                     | 0                                    | 94   | 1                      | 2               | 0       | 0   | 0        |
| Coal combustion                            | 5                                 | 0                 | 0                          | 0                      | 0                     | 0                                    | 0    | 93                     | 1               | 1       | 0   | 0        |
| Biomass Burning                            | 0                                 | 0                 | 0                          | 0                      | 0                     | 0                                    | 0    | 2                      | 95              | 0       | 0   | 3        |
| Cooking                                    | 0                                 | 0                 | 0                          | 0                      | 0                     | 0                                    | 0    | 0                      | 0               | 95      | 2   | 3        |
| SOA                                        | 6                                 | 1                 | 0                          | 0                      | 0                     | 0                                    | 0    | 1                      | 0               | 0       | 90  | 2        |
| <b>DISP Diagnostics</b>                    | Error Code: 0                     |                   |                            |                        |                       | Largest Decrease in Q: -16.3 (-0.7%) |      |                        |                 |         |     |          |
| Factor Swaps                               | $dQ^{\max}=4$                     | 0                 | 0                          | 0                      | 0                     | 0                                    | 0    | 0                      | 0               | 0       | 0   | 0        |
|                                            | $dQ^{\max}=8$                     | 0                 | 0                          | 0                      | 0                     | 0                                    | 0    | 0                      | 0               | 0       | 0   | 0        |
|                                            | $dQ^{\max}=15$                    | 0                 | 0                          | 0                      | 0                     | 0                                    | 0    | 0                      | 0               | 0       | 0   | 0        |
|                                            | $dQ^{\max}=25$                    | 0                 | 0                          | 0                      | 0                     | 0                                    | 0    | 0                      | 0               | 0       | 0   | 0        |
| <b>BS-DISP Diagnostics</b>                 | # of runs accepted: 49 out of 101 |                   |                            |                        |                       | Largest Decrease in Q: -10.5 (-0.4%) |      |                        |                 |         |     |          |
| # of Decreases in Q: 0                     |                                   |                   | # of Swaps in Best Fit: 32 |                        |                       |                                      |      | # of Swaps in DISP: 20 |                 |         |     |          |
| Factor Swaps                               | $dQ^{\max}=0.5$                   | 12                | 1                          | 1                      | 9                     | 26                                   | 2    | 2                      | 10              | 20      | 6   | 15       |
|                                            | $dQ^{\max}=1$                     | 12                | 2                          | 1                      | 11                    | 26                                   | 2    | 2                      | 11              | 20      | 6   | 15       |
|                                            | $dQ^{\max}=2$                     | 13                | 2                          | 2                      | 13                    | 30                                   | 2    | 4                      | 12              | 22      | 6   | 15       |
|                                            | $dQ^{\max}=4$                     | 18                | 3                          | 4                      | 16                    | 35                                   | 2    | 4                      | 17              | 23      | 6   | 15       |

**Table S2. Summary of error estimation diagnostics from BS, DISP and BS-DISP for PMFt.**

| <b>BS Mapping(<math>R \geq 0.6</math>)</b> | Secondary Nitrate                 | Secondary Sulfate          | Vehicle Exhaust | Industrial /Tire Wear | Industrial Emission 2                | Residual Oil Combustion | Dust | Coal combustion | Unmapped |
|--------------------------------------------|-----------------------------------|----------------------------|-----------------|-----------------------|--------------------------------------|-------------------------|------|-----------------|----------|
| Secondary Nitrate                          | 100                               | 0                          | 0               | 0                     | 0                                    | 0                       | 0    | 0               | 0        |
| Secondary Sulfate                          | 1                                 | 93                         | 0               | 1                     | 0                                    | 0                       | 1    | 1               | 3        |
| Vehicle Exhaust                            | 11                                | 0                          | 73              | 5                     | 0                                    | 0                       | 0    | 3               | 8        |
| Industrial / Tire Wear                     | 0                                 | 0                          | 0               | 100                   | 0                                    | 0                       | 0    | 0               | 0        |
| Industrial Emission 2                      | 0                                 | 0                          | 0               | 0                     | 100                                  | 0                       | 0    | 0               | 0        |
| Residual Oil Combustion                    | 0                                 | 0                          | 0               | 0                     | 0                                    | 100                     | 0    | 0               | 0        |
| Dust                                       | 0                                 | 0                          | 1               | 1                     | 0                                    | 0                       | 97   | 1               | 0        |
| Coal combustion                            | 2                                 | 1                          | 0               | 1                     | 0                                    | 0                       | 0    | 96              | 0        |
| <b>DISP Diagnostics</b>                    | Error Code: 0                     |                            |                 |                       | Largest Decrease in Q: -17.6 (-1.3%) |                         |      |                 |          |
| Factor Swaps                               | $dQ^{\max}=4$                     | 0                          | 0               | 0                     | 0                                    | 0                       | 0    | 0               | 0        |
|                                            | $dQ^{\max}=8$                     | 0                          | 0               | 0                     | 0                                    | 0                       | 0    | 0               | 0        |
|                                            | $dQ^{\max}=15$                    | 0                          | 0               | 0                     | 0                                    | 0                       | 0    | 0               | 0        |
|                                            | $dQ^{\max}=25$                    | 0                          | 0               | 0                     | 0                                    | 0                       | 0    | 0               | 0        |
| <b>BS-DISP Diagnostics</b>                 | # of runs accepted: 52 out of 101 |                            |                 |                       | Largest Decrease in Q: -2.3 (-0.2%)  |                         |      |                 |          |
| # of Decreases in Q: 0                     |                                   | # of Swaps in Best Fit: 30 |                 |                       |                                      | # of Swaps in DISP: 19  |      |                 |          |
| Factor Swaps                               | $dQ^{\max}=0.5$                   | 0                          | 18              | 5                     | 23                                   | 36                      | 22   | 7               | 22       |
|                                            | $dQ^{\max}=1$                     | 0                          | 19              | 9                     | 24                                   | 40                      | 22   | 8               | 23       |
|                                            | $dQ^{\max}=2$                     | 0                          | 22              | 14                    | 25                                   | 48                      | 22   | 9               | 25       |
|                                            | $dQ^{\max}=4$                     | 1                          | 25              | 18                    | 27                                   | 60                      | 22   | 10              | 31       |

**Table S3. The MM-PMF input data statistics for the modelled chemical compounds and base model diagnostics obtained for the 11-factor solution.**

| Species                | R <sup>2</sup> | Intercept | Slope |
|------------------------|----------------|-----------|-------|
| Chloride               | 0.39           | 0.29      | 0.42  |
| Nitrate                | 0.86           | 0.86      | 0.84  |
| Sulfate                | 0.73           | 1.04      | 0.85  |
| Ammonium               | 0.88           | 0.43      | 0.91  |
| EC                     | 0.86           | -0.02     | 0.95  |
| OC                     | 0.86           | -0.11     | 0.99  |
| As                     | 0.98           | 0.01      | 0.99  |
| Ba                     | 0.97           | -0.01     | 0.99  |
| Ca                     | 0.95           | 0.01      | 0.93  |
| Cr                     | 0.95           | 0.01      | 0.92  |
| Cu                     | 0.88           | 0.01      | 0.86  |
| Fe                     | 0.42           | 0.22      | 0.32  |
| K                      | 0.95           | 0.01      | 0.99  |
| Mn                     | 0.98           | 0.01      | 0.97  |
| Ni                     | 0.91           | 0.01      | 0.85  |
| Pb                     | 0.54           | 0.02      | 0.42  |
| Si                     | 0.98           | 0.04      | 0.89  |
| V                      | 0.98           | 0.01      | 0.97  |
| Zn                     | 0.81           | 0.02      | 0.74  |
| PAHs252                | 0.93           | 0.01      | 0.79  |
| PAHs276                | 0.92           | 0.01      | 0.82  |
| C <sub>6-8</sub> DICAs | 0.78           | 0.02      | 0.65  |
| OHBAAs                 | 0.64           | 0.01      | 0.49  |
| SFAs                   | 0.81           | 0.02      | 0.62  |
| phthalic acid          | 0.51           | 0.01      | 0.38  |
| Mannosan               | 0.91           | 0.01      | 0.83  |
| Levogluconan           | 0.88           | 0.01      | 0.93  |
| α-pinT                 | 0.72           | -0.01     | 0.88  |
| DHOPA                  | 0.62           | 0.01      | 0.66  |
| C <sub>9</sub> -acids  | 0.84           | 0.02      | 0.82  |



**Table S4. Pearson correlation (R) of MM-PMF factor contributions with corresponding tracer species, meteorological parameters (wind speed [WS], temperature [T], and relative humidity [RH]), and gas concentrations (SO<sub>2</sub>, CO, and NO<sub>x</sub>).**

| PMF Factor      | Secondary Nitrate | Secondary Sulfate | Vehicle Exhaust | Industrial Emission /Tire Wear | Industrial Emission 2 | Residual Oil Combustion | Dust  | Coal combustion | Biomass Burning | Cooking | SOA   |
|-----------------|-------------------|-------------------|-----------------|--------------------------------|-----------------------|-------------------------|-------|-----------------|-----------------|---------|-------|
| WS(m/s)         | -0.52             | 0.16              | -0.12           | -0.34                          | -0.06                 | -0.08                   | -0.10 | -0.23           | -0.21           | -0.15   | -0.39 |
| T(°C)           | -0.18             | -0.22             | -0.09           | 0.08                           | -0.18                 | 0.39                    | 0.26  | -0.08           | -0.18           | -0.12   | -0.29 |
| RH(%)           | 0.14              | -0.13             | -0.18           | -0.01                          | 0.05                  | 0.19                    | -0.26 | -0.23           | 0.19            | 0.33    | 0.05  |
| SO <sub>2</sub> | 0.59              | 0.32              | 0.46            | 0.52                           | 0.51                  | -0.05                   | -0.18 | 0.59            | 0.58            | 0.01    | 0.67  |
| CO              | 0.79              | 0.36              | 0.58            | 0.35                           | 0.59                  | -0.03                   | -0.17 | 0.56            | 0.69            | 0.11    | 0.77  |
| NO <sub>x</sub> | 0.54              | -0.19             | 0.67            | 0.49                           | 0.31                  | 0.30                    | 0.10  | 0.33            | 0.50            | 0.15    | 0.43  |

**Table S5. The average concentration of PM<sub>2.5</sub> and the percentage of components under different air mass clusters.**

| Component                     | Cluster-1                        |               | Cluster-2                        |               | Cluster-3                        |               | Cluster-4                        |               |
|-------------------------------|----------------------------------|---------------|----------------------------------|---------------|----------------------------------|---------------|----------------------------------|---------------|
|                               | Concentration, ug/m <sup>3</sup> | Percentage, % |
| SO <sub>4</sub> <sup>2-</sup> | 10.1                             | 16.8%         | 9.6                              | 14.5%         | 5.1                              | 15.2%         | 4.6                              | 23.2%         |
| NO <sub>3</sub> <sup>-</sup>  | 20.7                             | 34.5%         | 24.1                             | 35.5%         | 8.4                              | 25.0%         | 3.1                              | 15.7%         |
| NH <sub>4</sub> <sup>+</sup>  | 10.1                             | 16.8%         | 11.3                             | 16.6%         | 4.6                              | 13.6%         | 2.7                              | 13.5%         |
| Cl <sup>-</sup>               | 1.1                              | 1.7%          | 0.8                              | 1.2%          | 0.8                              | 2.4%          | 0.6                              | 3.2%          |
| OM<br>(1.4*OC)                | 9.5                              | 15.8%         | 11.2                             | 16.4%         | 8.4                              | 24.9%         | 6.1                              | 30.3%         |
| EC                            | 1.6                              | 2.7%          | 2.3                              | 3.4%          | 1.4                              | 4.1%          | 0.6                              | 3.0%          |
| Elements                      | 1.6                              | 2.6%          | 2.2                              | 3.2%          | 1.2                              | 3.5%          | 1.2                              | 5.8%          |
| Unexplained                   | 5.4                              | 9.1%          | 6.3                              | 9.2%          | 3.8                              | 11.4%         | 1.1                              | 5.3%          |
| PM <sub>2.5</sub>             | 60.0                             | /             | 64.4                             | /             | 32.9                             | /             | 19.8                             | /             |

Cluster 1 and 4 with longer trajectory length, representing long range transport air masses; clusters 2 and 3 with shorter trajectory length, indicating local or medium range transport air masses. Cluster 1 represents the air mass transport from Hebei, Shandong and Henan Provinces in the central region, and the average concentration of PM<sub>2.5</sub> reached 60.0 µg/m<sup>3</sup>. Cluster 2 represents the local transport in Shanghai and neighbouring areas. The average PM<sub>2.5</sub> concentration was the highest among the four clusters, which was 64.4 µg/m<sup>3</sup>. Cluster 3 is a shorter distance transport of marine air masses in the eastern sea area of Shanghai, with a low PM<sub>2.5</sub> average of 32.9 µg/m<sup>3</sup>. Cluster 4 represents long-distance air mass transport from the northern seas of China and the north-eastern regions of Liaoning province and Inner Mongolia. The PM<sub>2.5</sub> concentration was the lowest among the four clusters, only 19.8 µg/m<sup>3</sup>.

**Table S6. The PMFt input data statistics for the modelled chemical compounds and base model diagnostics obtained for the 8-factor solution.**

| Species  | R <sup>2</sup> | Intercept | Slope |
|----------|----------------|-----------|-------|
| Chloride | 0.18           | 0.41      | 0.37  |
| Nitrate  | 0.84           | 1.49      | 0.79  |
| Sulfate  | 0.78           | 1.22      | 0.78  |
| Ammonium | 0.84           | 0.59      | 0.85  |
| EC       | 0.85           | -0.04     | 0.94  |
| OC       | 0.84           | 0.22      | 0.93  |
| As       | 0.98           | -0.01     | 1.01  |
| Ba       | 0.98           | 0         | 1.02  |
| Ca       | 0.89           | 0.01      | 0.88  |
| Cr       | 0.94           | 0.01      | 0.91  |
| Cu       | 0.84           | 0.01      | 0.81  |
| Fe       | 0.99           | 0.03      | 0.91  |
| K        | 0.95           | 0.01      | 0.96  |
| Mn       | 0.98           | 0.01      | 0.97  |
| Ni       | 0.91           | 0.01      | 0.83  |
| Pb       | 0.98           | 0         | 0.98  |
| Si       | 0.98           | 0.04      | 0.88  |
| V        | 0.99           | 0         | 0.99  |
| Zn       | 0.81           | 0.01      | 0.75  |

**Table S7: Concentrations( $\mu\text{g}/\text{m}^3$ ) of reconstructed  $\text{PM}_{2.5}$  and OC from MM-PMF and PMFt.**

| Factor                          | MM-PMF            |      | PMFt              |      |
|---------------------------------|-------------------|------|-------------------|------|
|                                 | $\text{PM}_{2.5}$ | OC   | $\text{PM}_{2.5}$ | OC   |
| SOA                             | 6.71              | 0.25 |                   |      |
| Secondary Nitrate               | 15.25             | 1.31 | 19.71             | 1.09 |
| Secondary Sulfate               | 7.10              | 1.36 | 8.82              | 2.05 |
| Vehicle Exhaust                 | 5.13              | 1.05 | 6.43              | 1.04 |
| Industrial Emission / Tire Wear | 1.36              | 0.17 | 1.32              | 0.17 |
| Industrial Emission 2           | 0.46              | 0.05 | 0.91              | 0.21 |
| Residual Oil Combustion         | 0.82              | 0.69 | 1.40              | 0.83 |
| Dust                            | 2.27              | 0.09 | 2.26              | 0.24 |
| Coal combustion                 | 3.07              | 0.46 | 3.75              | 0.71 |
| Biomass Burning                 | 2.24              | 0.37 |                   |      |
| Cooking                         | 1.17              | 0.69 |                   |      |
